# Supplementary material for: A Novel Heterosis Utilization Pattern in Huang-Huai-Hai Maize Production
Source: Research Square preprint supplement (doi:10.21203/rs.3.rs-7644869/v1), 2025-10-10
Supplement: Supplementary file 1 [file 1c0680b0c46fe9e12d852c42.xlsx]

## Sheet: Sheet1
Table S1. Characteristic genomic regions of the "MY73" pattern identified by XP-CLR analysis
Event	Region 1		Region 2		Region 3		Region 4		Region 5
	Pos. ( Mb)	XP-CLR	Pos. ( Mb)	XP-CLR	Pos. ( Mb)	XP-CLR	Pos. ( Mb)	XP-CLR	Pos. ( Mb)	XP-CLR
Sub9-Sub1	Chr.2: 31.12-31.14	59.1344	Chr.3: 191.56-191.58	75.5056	Chr.6: 49.12-49.14	71.4984	Chr.10: 48.18-48.20	29.3696	Chr.10: 107.46-107.48	56.3321
Sub9-Sub2	Chr.2: 31.12-31.14	57.6344	Chr.3: 191.56-191.58	41.683	Chr.6: 49.12-49.14	81.091	Chr.10: 48.18-48.20	88.2473	Chr.10: 107.46-107.48	44.6165
Sub9-Sub3	Chr.2: 31.12-31.14	50.0844	Chr.3: 191.56-191.58	30.724	Chr.6: 49.12-49.14	57.8763	Chr.10: 48.18-48.20	65.8197	Chr.10: 107.46-107.48	56.1749
Sub9-Sub4	Chr.2: 31.12-31.14	64.2707	Chr.3: 191.56-191.58	24.6093	Chr.6: 49.12-49.14	84.7812	Chr.10: 48.18-48.20	19.8656	Chr.10: 107.46-107.48	25.216
Sub9-Sub5	Chr.2: 31.12-31.14	17.5472	Chr.3: 191.56-191.58	47.5369	Chr.6: 49.12-49.14	36.8846	Chr.10: 48.18-48.20	17.8963	Chr.10: 107.46-107.48	31.8679
Sub9-Sub6	Chr.2: 31.12-31.14	40.8596	Chr.3: 191.56-191.58	48.2119	Chr.6: 49.12-49.14	72.1668	Chr.10: 48.18-48.20	82.0933	Chr.10: 107.46-107.48	30.9041
Sub9-Sub7	Chr.2: 31.12-31.14	33.8367	Chr.3: 191.56-191.58	45.9356	Chr.6: 49.12-49.14	54.1224	Chr.10: 48.18-48.20	44.7987	Chr.10: 107.46-107.48	46.9513
Sub9-Sub8	Chr.2: 31.12-31.14	17.2552	Chr.3: 191.56-191.58	15.8749	Chr.6: 49.12-49.14	23.8556	Chr.10: 48.18-48.20	10.3331	Chr.10: 107.46-107.48	21.3556
Sub1-Sub2	Chr.2: 31.12-31.14	0	Chr.3: 191.56-191.58	4.00499	Chr.6: 49.12-49.14	0	Chr.10: 48.18-48.20	0	Chr.10: 107.46-107.48	12.0877
Sub1-Sub3	Chr.2: 31.12-31.14	0	Chr.3: 191.56-191.58	0	Chr.6: 49.12-49.14	0	Chr.10: 48.18-48.20	0	Chr.10: 107.46-107.48	0
Sub1-Sub4	Chr.2: 31.12-31.14	0	Chr.3: 191.56-191.58	11.92	Chr.6: 49.12-49.14	0	Chr.10: 48.18-48.20	0	Chr.10: 107.46-107.48	37.6104
Sub1-Sub5	Chr.2: 31.12-31.14	21.7134	Chr.3: 191.56-191.58	21.8325	Chr.6: 49.12-49.14	11.8286	Chr.10: 48.18-48.20	17.9949	Chr.10: 107.46-107.48	38.8999
Sub1-Sub6	Chr.2: 31.12-31.14	0	Chr.3: 191.56-191.58	0	Chr.6: 49.12-49.14	0	Chr.10: 48.18-48.20	0	Chr.10: 107.46-107.48	24.0683
Sub1-Sub7	Chr.2: 31.12-31.14	0	Chr.3: 191.56-191.58	0	Chr.6: 49.12-49.14	0	Chr.10: 48.18-48.20	3.71489	Chr.10: 107.46-107.48	9.72968
Sub1-Sub8	Chr.2: 31.12-31.14	0	Chr.3: 191.56-191.58	27.1326	Chr.6: 49.12-49.14	8.83807	Chr.10: 48.18-48.20	14.1358	Chr.10: 107.46-107.48	27.8567
Sub2-Sub3	Chr.2: 31.12-31.14	0	Chr.3: 191.56-191.58	0	Chr.6: 49.12-49.14	0	Chr.10: 48.18-48.20	0	Chr.10: 107.46-107.48	0
Sub2-Sub4	Chr.2: 31.12-31.14	0	Chr.3: 191.56-191.58	4.54147	Chr.6: 49.12-49.14	0	Chr.10: 48.18-48.20	0	Chr.10: 107.46-107.48	30.8478
Sub2-Sub5	Chr.2: 31.12-31.14	28.1644	Chr.3: 191.56-191.58	0	Chr.6: 49.12-49.14	20.8864	Chr.10: 48.18-48.20	57.6931	Chr.10: 107.46-107.48	26.3294
Sub2-Sub6	Chr.2: 31.12-31.14	0	Chr.3: 191.56-191.58	0	Chr.6: 49.12-49.14	0	Chr.10: 48.18-48.20	0	Chr.10: 107.46-107.48	19.435
Sub2-Sub7	Chr.2: 31.12-31.14	0	Chr.3: 191.56-191.58	0	Chr.6: 49.12-49.14	0	Chr.10: 48.18-48.20	4.12858	Chr.10: 107.46-107.48	7.82465
Sub2-Sub8	Chr.2: 31.12-31.14	0	Chr.3: 191.56-191.58	12.6543	Chr.6: 49.12-49.14	9.3288	Chr.10: 48.18-48.20	21.6753	Chr.10: 107.46-107.48	20.6223
Sub3-Sub4	Chr.2: 31.12-31.14	0	Chr.3: 191.56-191.58	0	Chr.6: 49.12-49.14	0	Chr.10: 48.18-48.20	0	Chr.10: 107.46-107.48	20.6604
Sub3-Sub5	Chr.2: 31.12-31.14	20.0812	Chr.3: 191.56-191.58	0	Chr.6: 49.12-49.14	12.3041	Chr.10: 48.18-48.20	39.957	Chr.10: 107.46-107.48	25.3962
Sub3-Sub6	Chr.2: 31.12-31.14	0	Chr.3: 191.56-191.58	0	Chr.6: 49.12-49.14	0	Chr.10: 48.18-48.20	0	Chr.10: 107.46-107.48	5.61582
Sub3-Sub7	Chr.2: 31.12-31.14	0	Chr.3: 191.56-191.58	0	Chr.6: 49.12-49.14	0	Chr.10: 48.18-48.20	3.1537	Chr.10: 107.46-107.48	4.38639
Sub3-Sub8	Chr.2: 31.12-31.14	0	Chr.3: 191.56-191.58	4.74402	Chr.6: 49.12-49.14	6.02749	Chr.10: 48.18-48.20	15.2275	Chr.10: 107.46-107.48	8.39505
Sub4-Sub5	Chr.2: 31.12-31.14	30.1316	Chr.3: 191.56-191.58	0	Chr.6: 49.12-49.14	17.6564	Chr.10: 48.18-48.20	16.3185	Chr.10: 107.46-107.48	3.56792
Sub4-Sub6	Chr.2: 31.12-31.14	0	Chr.3: 191.56-191.58	0	Chr.6: 49.12-49.14	0	Chr.10: 48.18-48.20	0	Chr.10: 107.46-107.48	0.143881
Sub4-Sub7	Chr.2: 31.12-31.14	0	Chr.3: 191.56-191.58	0	Chr.6: 49.12-49.14	0	Chr.10: 48.18-48.20	1.81727	Chr.10: 107.46-107.48	0.0262176
Sub4-Sub8	Chr.2: 31.12-31.14	0	Chr.3: 191.56-191.58	6.00284	Chr.6: 49.12-49.14	9.36568	Chr.10: 48.18-48.20	6.68759	Chr.10: 107.46-107.48	0.277729
Sub5-Sub6	Chr.2: 31.12-31.14	0	Chr.3: 191.56-191.58	0	Chr.6: 49.12-49.14	0	Chr.10: 48.18-48.20	0	Chr.10: 107.46-107.48	0
Sub5-Sub7	Chr.2: 31.12-31.14	0	Chr.3: 191.56-191.58	0	Chr.6: 49.12-49.14	0	Chr.10: 48.18-48.20	0.166562	Chr.10: 107.46-107.48	0
Sub5-Sub8	Chr.2: 31.12-31.14	0	Chr.3: 191.56-191.58	0	Chr.6: 49.12-49.14	3.88806	Chr.10: 48.18-48.20	4.27823	Chr.10: 107.46-107.48	0
Sub6-Sub7	Chr.2: 31.12-31.14	0	Chr.3: 191.56-191.58	0	Chr.6: 49.12-49.14	0	Chr.10: 48.18-48.20	4.35749	Chr.10: 107.46-107.48	0
Sub6-Sub8	Chr.2: 31.12-31.14	0	Chr.3: 191.56-191.58	13.5579	Chr.6: 49.12-49.14	8.52321	Chr.10: 48.18-48.20	0	Chr.10: 107.46-107.48	0
Sub7-Sub8	Chr.2: 31.12-31.14	0	Chr.3: 191.56-191.58	14.066	Chr.6: 49.12-49.14	7.96725	Chr.10: 48.18-48.20	11.4611	Chr.10: 107.46-107.48	10.6996
Note: Sub1-Sub9 correspond to X/Reid, X/TSPT, Reid/TSPT-LRC, Reid/TSPT, BSSS/NSS, X/TSPT-LRC, X/Reid-PB, Reid/PB, and "MY73" patterns respectively
